# Supplementary material for: Risk factors for laminitis and nonsurvival in acute colitis: Retrospective study of 85 hospitalized horses (2011‐2019)
Source: PubMed Central journal article supplement (PMC8295695; doi:10.1111/jvim.16147), 2021-05-03
Supplement: JVIM-35-2019-s001.pdf [file JVIM-35-2019-s001.pdf]

**Supplemental Table 1** - Univariate logistic regression for prediction of laminitis in 85 horses hospitalized for acute colitis.

| Variable                            | Odds ratio (95% CI)         | P value |
|-------------------------------------|-----------------------------|---------|
| <b>Final diagnosis</b>              |                             |         |
| <b>Coronavirus</b>                  | <i>Referent</i>             |         |
| <b>Neorickettsiosis</b>             | 24.48 (1.33 - 451.73)       | 0.03    |
| <b>Salmonellosis</b>                | 6.6 (0.32 - 137.78)         | 0.22    |
| <b>Unknown</b>                      | 5.63 (0.27 - 116.99)        | 0.26    |
| <b>Admission temperature (degF)</b> | 1.33 (0.96 - 1.84)          | 0.09    |
| <b>Admission heart rate (bpm)</b>   | 1.06 (1.02 - 1.1)           | 0.003   |
| <b>Packed cell volume (%)</b>       | 1.02 (0.97 - 1.08)          | 0.37    |
| <b>Total solids (g/dL)</b>          | 0.47 (0.28 - 0.79)          | 0.004   |
| <b>Lactate (mmol/L)</b>             | 1.15 (0.95 - 1.39)          | 0.14    |
| <b>Blood glucose (mg/dL)</b>        | 0.99 (0.98 - 1.01)          | 0.71    |
| <b>White blood cells (/μL)</b>      | 1.17 (1.02 - 1.33)          | 0.02    |
| <b>Neutrophils (/μL)</b>            | 1.11 (0.95 - 1.3)           | 0.19    |
| <b>Band neutrophils (/μL)</b>       | 27.31 (2.24 - 332.64)       | 0.01    |
| <b>Lymphocytes (/μL)</b>            | 1.67 (1.13 - 2.48)          | 0.01    |
| <b>Eosinophils (/μL)</b>            | 0.03 (1.09e-06 - 989.8)     | 0.52    |
| <b>Basophils (/μL)</b>              | 0.009 (1.01e-09 - 91707.29) | 0.57    |
| <b>Platelet count (/μL)</b>         | 1.003 (0.99 - 1.02)         | 0.67    |
| <b>Fibrinogen (mg/dL)</b>           | 1.002 (0.99 - 1.004)        | 0.23    |
| <b>Glucose (mg/dL)</b>              | 0.996 (0.98 - 1.01)         | 0.61    |
| <b>Creatinine (mg/dL)</b>           | 1.11 (0.72 - 1.71)          | 0.64    |
| <b>Sodium (mmol/L)</b>              | 0.98 (0.89 - 1.08)          | 0.66    |
| <b>Potassium (mmol/L)</b>           | 0.9 (0.47 - 1.72)           | 0.76    |
| <b>Chloride (mmol/L)</b>            | 1.01 (0.94 - 1.1)           | 0.73    |
| <b>tCO<sub>2</sub> (mmol/L)</b>     | 0.93 (0.84 - 1.03)          | 0.14    |
| <b>Total calcium (mg/dL)</b>        | 0.74 (0.5 - 1.09)           | 0.13    |
| <b>Phosphorus (mg/dL)</b>           | 1.21 (0.96 - 1.52)          | 0.11    |
| <b>Total protein (g/dL)</b>         | 0.42 (0.22 - 0.78)          | 0.006   |
| <b>Albumin (g/dL)</b>               | 0.13 (0.03 - 0.51)          | 0.003   |
| <b>AST (U/L)</b>                    | 1.00 (0.99 - 1.002)         | 0.92    |
| <b>CK (U/L)</b>                     | 1.00 (0.99 - 1.00)          | 0.5     |
| <b>GGT (U/L)</b>                    | 0.98 (0.933 - 1.03)         | 0.39    |
| <b>Total bilirubin (mg/dL)</b>      | 0.91 (0.69 - 1.18)          | 0.47    |
