# Supplementary material for: Risk factors for laminitis and nonsurvival in acute colitis: Retrospective study of 85 hospitalized horses (2011‐2019)
Source: PubMed Central journal article supplement (PMC8295695; doi:10.1111/jvim.16147), 2021-05-03
Supplement: JVIM-35-2019-s002.pdf [file JVIM-35-2019-s002.pdf]

**Supplemental Table 2** – Univariate Cox regression for prediction of non-survival in 85 horses hospitalized for acute colitis.

| <b>Variable</b>                     | <b>Hazard ratio (95% CI)</b>           | <b>P value</b> |
|-------------------------------------|----------------------------------------|----------------|
| <b>Final diagnosis</b>              |                                        |                |
| <b>Coronavirus</b>                  | 1.41 x10 <sup>-20</sup> (incalculable) | Incalculable   |
| <b>Neorickettsiosis</b>             | Referent                               | *              |
| <b>Salmonellosis</b>                | 0.49 (-0.03 - 1.01)                    | 0.07           |
| <b>Unknown</b>                      | 0.79 (0.01 - 1.57)                     | 0.05           |
| <b>Laminitis – yes</b>              | 4.51 (1.89 - 10.78)                    | 0.0008         |
| <b>Admission temperature (degF)</b> | 0.98 (0.76 - 1.26)                     | 0.86           |
| <b>Admission heart rate (bpm)</b>   | 1.05 (1.03 - 1.08)                     | <0.001         |
| <b>Packed cell volume (%)</b>       | 1.07 (1.04 - 1.11)                     | <0.001         |
| <b>Total solids (g/dL)</b>          | 0.72 (0.49 - 1.06)                     | 0.09           |
| <b>Lactate (mmol/L)</b>             | 1.29 (1.14 - 1.45)                     | <0.001         |
| <b>Blood glucose (mg/dL)</b>        | 1.01 (1.01 - 1.02)                     | 0.002          |
| <b>White blood cells (/μL)</b>      | 1.19 (1.08 - 1.32)                     | <0.001         |
| <b>Neutrophils (/μL)</b>            | 1.15 (1.03 - 1.29)                     | 0.01           |
| <b>Band neutrophils (/μL)</b>       | 2.76 (0.95 - 7.99)                     | 0.06           |
| <b>Lymphocytes (/μL)</b>            | 1.55 (1.2 - 1.99)                      | 0.001          |
| <b>Eosinophils (/μL)</b>            | 0.03 (5.23e-06 - 190.8)                | 0.44           |
| <b>Basophils (/μL)</b>              | 0.04 (2.19e-06 - 869.91)               | 0.54           |
| <b>Platelet count (/μL)</b>         | 0.99 (0.99 - 1.01)                     | 0.34           |
| <b>Fibrinogen (mg/dL)</b>           | 1.00 (0.99 - 1.004)                    | 0.17           |
| <b>Glucose (mg/dL)</b>              | 1.02 (1.01 - 1.03)                     | <0.001         |
| <b>Creatinine (mg/dL)</b>           | 1.47 (1.12 - 1.93)                     | 0.005          |
| <b>Sodium (mmol/L)</b>              | 0.97 (0.9 - 1.05)                      | 0.47           |
| <b>Potassium (mmol/L)</b>           | 1.5 (1.04 - 2.14)                      | 0.03           |
| <b>Chloride (mmol/L)</b>            | 0.96 (0.9 - 1.02)                      | 0.21           |
| <b>tCO<sub>2</sub> (mmol/L)</b>     | 0.92 (0.85 - 0.99)                     | 0.03           |
| <b>Total calcium (mg/dL)</b>        | 0.64 (0.48 - 0.87)                     | 0.004          |
| <b>Phosphorus (mg/dL)</b>           | 1.3 (1.09 - 1.54)                      | 0.003          |
| <b>Total protein (g/dL)</b>         | 0.69 (0.45 - 1.08)                     | 0.1            |
| <b>Albumin (g/dL)</b>               | 0.61 (0.24 - 1.55)                     | 0.3            |
| <b>AST (U/L)</b>                    | 1.00 (0.99 - 1.002)                    | 0.35           |
| <b>CK (U/L)</b>                     | 1.00 (0.99 - 1.000)                    | 0.1            |
| <b>GGT (U/L)</b>                    | 1.0 (0.99 - 1.007)                     | 0.79           |
| <b>Total bilirubin (mg/dL)</b>      | 1.05 (0.89 - 1.25)                     | 0.57           |
